# Supplementary material for: Exon junction complex (EJC) core genes play multiple developmental roles in Physalis floridana
Source: PubMed Central journal article supplement (PMC6280879; doi:10.1007/s11103-018-0795-9), 2018-11-13
Supplement: 11103_2018_795_MOESM1_ESM.pdf [file 11103_2018_795_MOESM1_ESM.pdf]

## Supplementary material

### Exon Junction Complex (EJC) Core Genes Play Multiple Developmental Roles in *Physalis floridana*

Pichang Gong<sup>1,#</sup>, Jing Li<sup>1,2,#</sup>, Chaoying He<sup>1,2,\*</sup>

<sup>1</sup> State Key Laboratory of Systematic and Evolutionary Botany, Institute of Botany, Chinese Academy of Sciences, Beijing 100093 China;

<sup>2</sup> University of Chinese Academy of Sciences, Beijing 100049 China.

# These authors contributed equally to this work.

\* For correspondence: E-mail: [chaoying@ibcas.ac.cn](mailto:chaoying@ibcas.ac.cn); Tel: +86-10-62836085

Supplementary material contains:

Supplementary Figures S1-S13

Supplementary Tables S1-S3

**PFMAGO-VIGS probe; 391 bp**

(Sequence identity between *PFMAGO1* and *PFMAGO2* was 89.0%)

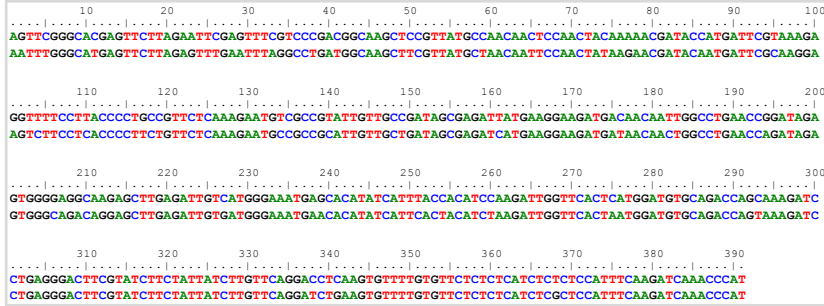

**PFY14-VIGS probe; 400 bp**

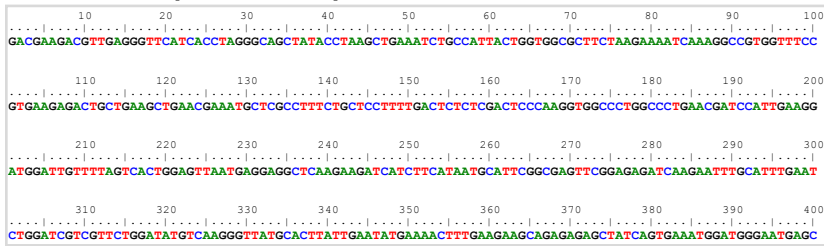

**PFelF4AIII-VIGS probe; 462 bp**

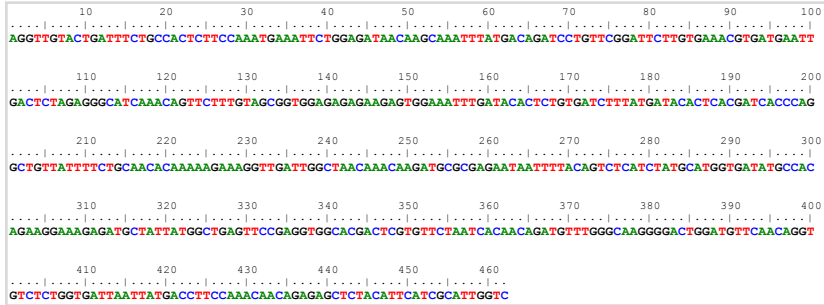

**PFBTZ-VIGS probe; 370 bp**

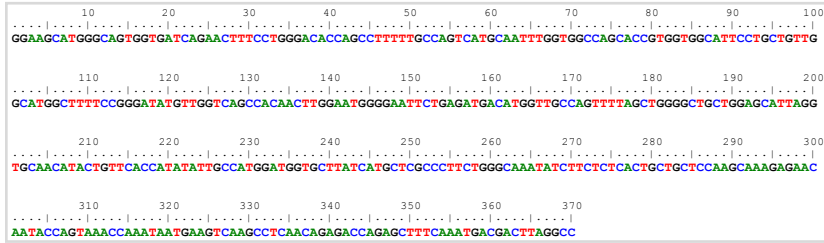

**Fig. S1** Sequences used to trigger gene silencing in VIGS. From top to bottom, the trigger sequence of *PFMAGO*-, *PFY14*-, *PFelF4AIII*- and *PFBTZ*-, and each length is given.

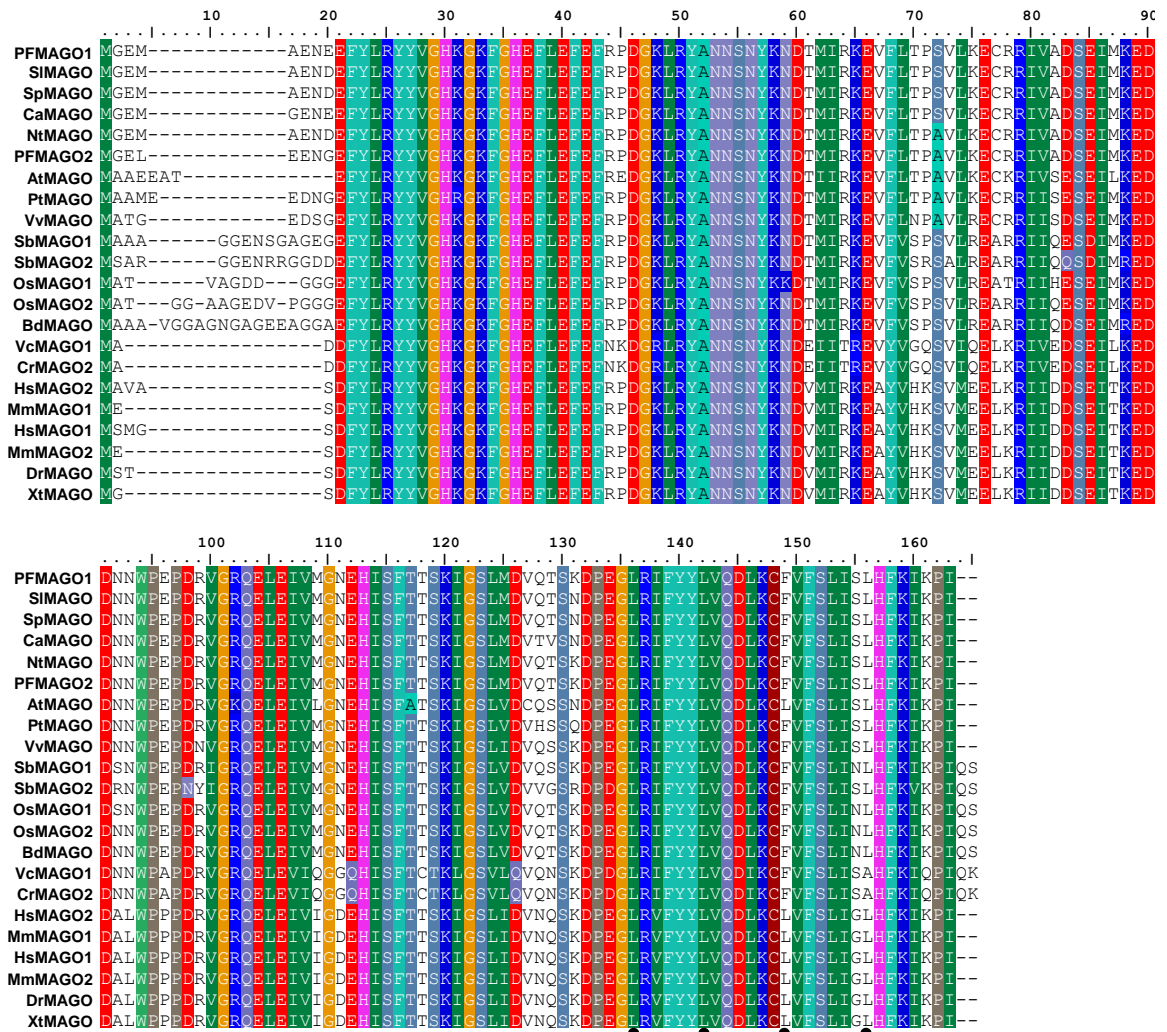

**Fig. S2** Multiple sequence alignment of the MAGO protein family.

Shaded regions with color indicate 100% amino acid similarity. Four conserved leucine residues that constitute a potential leucine zipper in the C-terminus (Pozzoli et al. 2004; Chu et al. 2009 ) are labeled by black cycles.

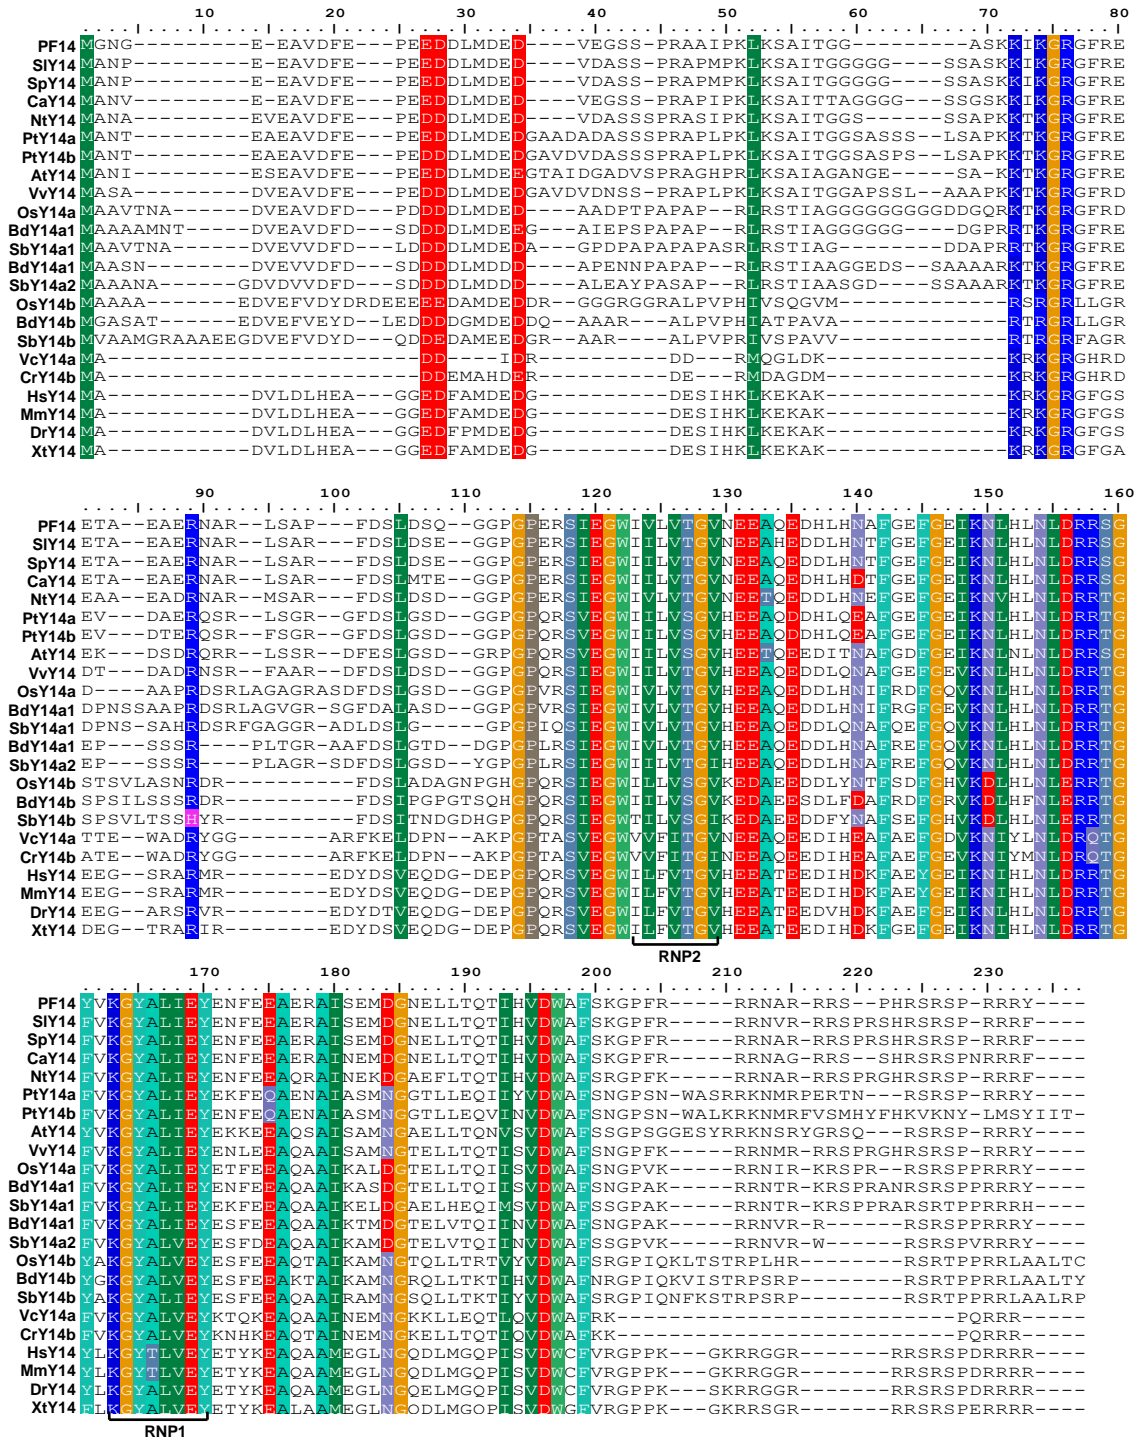

**Fig. S3** Multiple sequence alignment of the Y14 protein family. Shaded regions with color indicate 100% amino acid similarity. Conserved RNA recognition motifs of RNP1 and RNP2 (Lau et al. 2003; Shi and Xu 2003; Chu et al. 2009) are labeled in the middle area.



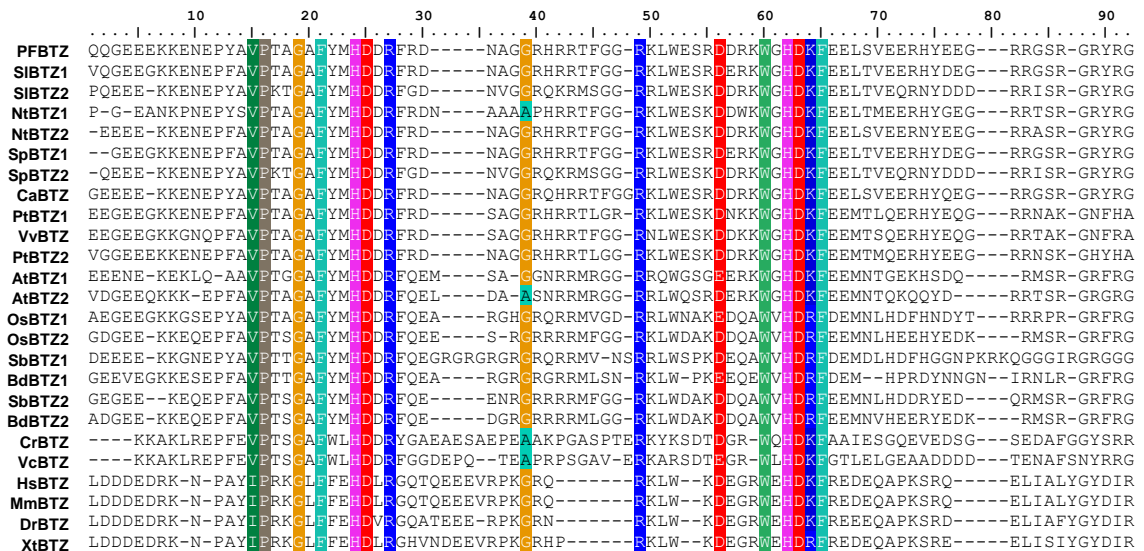

**Fig. S5** Multiple sequence alignment of the SELOR domain in the BTZ protein family.

Only the SELOR domain (Degot et al. 2004), part of the whole MSA, is shown. Shaded regions with color indicate 100% amino acid similarity.

| A                            | PFMAGO1                                                                                                     | PFMAGO2                                                                                                     | PFY14                                                                                | PFelF4AIII                                                                                                                                                                                                                                                                                                                                         | PFBTZ                                 |
|------------------------------|-------------------------------------------------------------------------------------------------------------|-------------------------------------------------------------------------------------------------------------|--------------------------------------------------------------------------------------|----------------------------------------------------------------------------------------------------------------------------------------------------------------------------------------------------------------------------------------------------------------------------------------------------------------------------------------------------|---------------------------------------|
| Residue range                | 9-151                                                                                                       | 9-151                                                                                                       | 77-170                                                                               | 5-391                                                                                                                                                                                                                                                                                                                                              | 144-217                               |
| Tertiary structural modeling | Nt- $\beta$ 1- $\beta$ 2- $\beta$ 3- $\beta$ 4- $\alpha$ 1- $\beta$ 5- $\beta$ 6- $\alpha$ 2- $\alpha$ 3-Ct | Nt- $\beta$ 1- $\beta$ 2- $\beta$ 3- $\beta$ 4- $\alpha$ 1- $\beta$ 5- $\beta$ 6- $\alpha$ 2- $\alpha$ 3-Ct | Nt- $\beta$ 1- $\alpha$ 1- $\beta$ 2- $\beta$ 3- $\alpha$ 2- $\beta$ 4- $\beta$ 5-Ct | Nt- $\alpha$ 1- $\alpha$ 2- $\beta$ 1- $\alpha$ 3- $\beta$ 2- $\alpha$ 4- $\beta$ 3- $\alpha$ 5- $\beta$ 4- $\beta$ 5- $\alpha$ 6- $\alpha$ 7- $\beta$ 6- $\alpha$ 8- $\beta$ 7- $\beta$ 8- $\alpha$ 9- $\beta$ 9- $\alpha$ 10- $\beta$ 10- $\alpha$ 11- $\beta$ 11- $\alpha$ 12- $\beta$ 13- $\alpha$ 13- $\beta$ 13- $\alpha$ 14- $\alpha$ 15-Ct | No $\alpha$ -helix nor $\beta$ -sheet |
| Template (PDB ID)            | X-Ray, 2.30 Å, PDB ID: 3EX7                                                                                 |                                                                                                             |                                                                                      |                                                                                                                                                                                                                                                                                                                                                    |                                       |
| Identity (%)                 | 82.52                                                                                                       | 81.25                                                                                                       | 54.29                                                                                | 78.97                                                                                                                                                                                                                                                                                                                                              | 27.63                                 |
| GMQE                         | 0.89                                                                                                        | 0.88                                                                                                        | 0.43                                                                                 | 0.92                                                                                                                                                                                                                                                                                                                                               | 0.03                                  |
| QMEAN4                       | -1.05                                                                                                       | -0.95                                                                                                       | -0.22                                                                                | -0.46                                                                                                                                                                                                                                                                                                                                              | -5.24                                 |
| Organism                     | <i>Homo sapiens</i>                                                                                         |                                                                                                             |                                                                                      |                                                                                                                                                                                                                                                                                                                                                    |                                       |

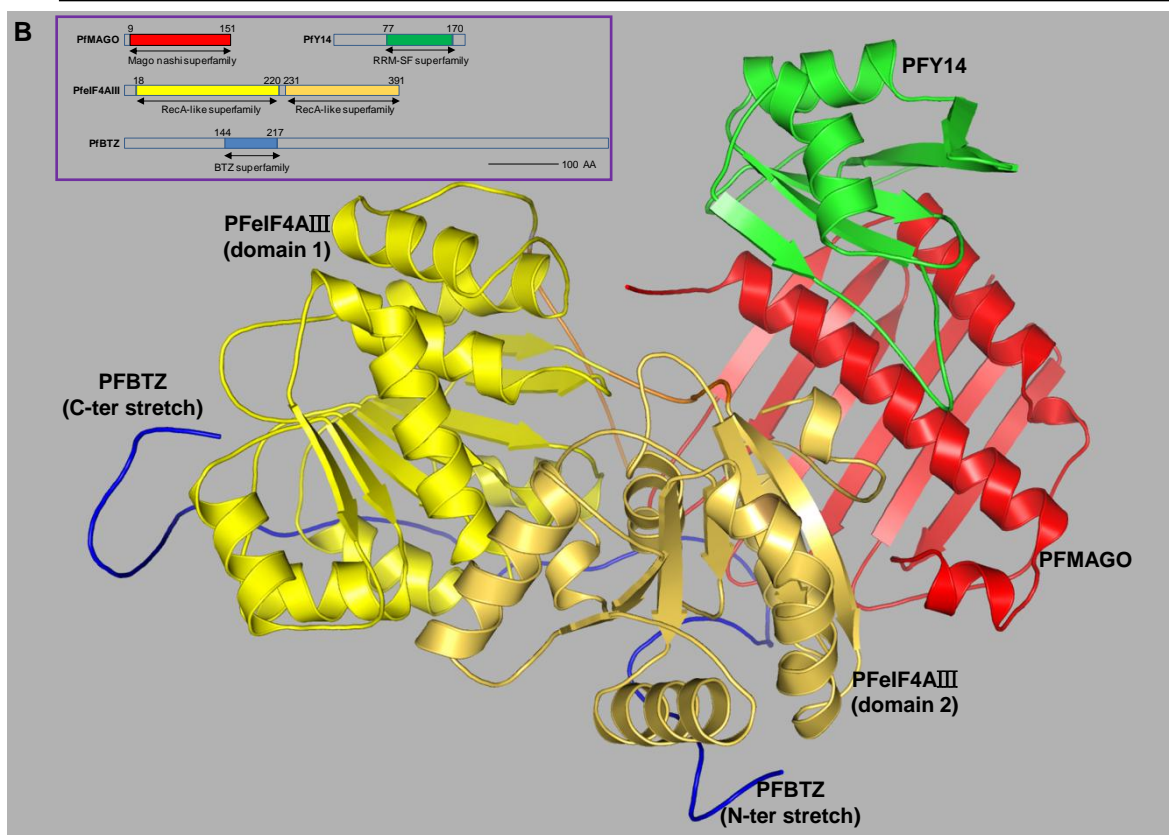

**Fig. S6** Tetrameric structure modeling of EJC core components in *P. floridana*.

**a** Quality factors of *Physalis* EJC protein structure modeling. Nt, protein N-terminal; Ct, protein C-terminal;  $\alpha$ ,  $\alpha$ -helix;  $\beta$ ,  $\beta$ -sheet. **b** The tetrameric structure reconstruction of the *Physalis* EJC core based on human EJC (PDB ID: 3EX7). Conserved protein domains of EJC core components were predicted using the Pfam program and are presented in the pink box. The position of each conserved region or motif is given. Bar, 100 amino acids (AA).

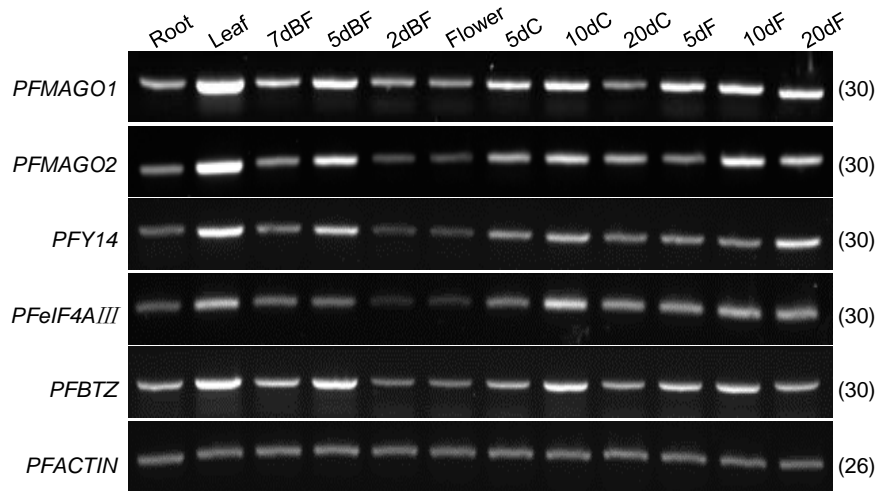

**Fig. S7** Expression of *Physalis* EJC core genes by semi-quantitative RT-PCR. The total RNAs from roots, leaves, flower buds (7dBF, 5dBF, and 2dBF abbreviated for the flower buds of 7-, 5-, and 2-d before flowering), blooming flowers, fruiting calyx (5dC, 10dC and 20dC is short of the calyx of 5-, 10- and 20-d after fertilization) and developing berries (5dF, 10dF and 20dF represent fruits of 5-, 10- and 20-d after fertilization) were subjected to RT-PCR. The PCR products of 30 cycles for each EJC genes were demonstrated; 26 cycles of *PFACTIN* gene were shown as a loading control.



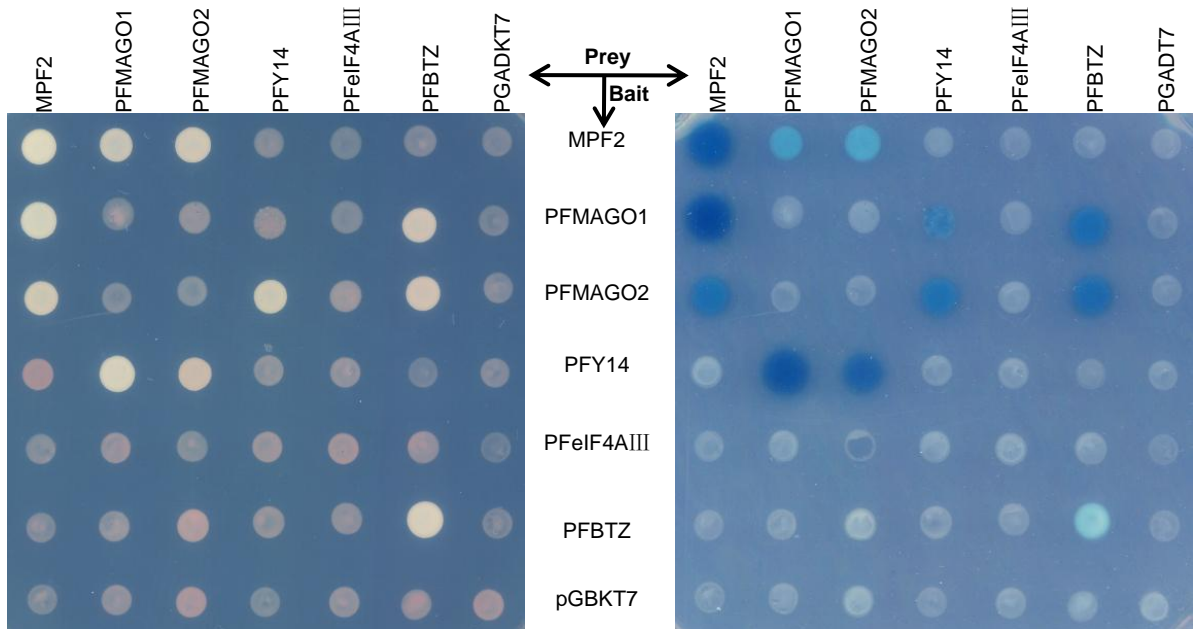

**Fig. S8** PPIs among *Physalis* EJC core proteins revealed by yeast two-hybrid analysis.

Yeast cell growth on a high-stringency selective plate (SD/-Leu-Trp-His-Ade) (Left panel) and nonlethal  $\beta$ -galactosidase tests were used to confirm the interactions (right panel). The empty pGADT7 and pGBKT7 constructs were used as the negative controls.

**A**

| Gene/VIGS         | Infected seedling number | Mutated seedling number | Gene expression of mutants at 14 DAI compared to NC                                                                                                         | Survival number (ratio) | Pollen viability | Fruit setting rate by self / cross-pollination |
|-------------------|--------------------------|-------------------------|-------------------------------------------------------------------------------------------------------------------------------------------------------------|-------------------------|------------------|------------------------------------------------|
| WT                | -                        | -                       | 1.00±0.05 ( <i>PFMAGO1</i> )<br>1.06±0.16 ( <i>PFMAGO2</i> )<br>0.99±0.21 ( <i>PFY14</i> )<br>0.95±0.11 ( <i>PFelF4AIII</i> )<br>1.03±0.18 ( <i>PFBTZ</i> ) | 30 (100%)               | 96.1%            | 95.5%/94.3%                                    |
| <i>TRV2</i> (NC)  | 30                       | -                       | 1.0 (for each gene)                                                                                                                                         | 30 (100%)               | 95.8%            | 95.3%/94.6%                                    |
| <i>PFMAGO</i>     | 120                      | 115                     | 0.26±0.13 ( <i>PFMAGO1</i> )<br>0.32±0.12 ( <i>PFMAGO2</i> )                                                                                                | 25 (21.7%)              | 45.2%            | 35.3%/89.5%                                    |
| <i>PFY14</i>      | 120                      | 112                     | 0.22±0.15                                                                                                                                                   | 0 (0)                   | 35.3%            | 0/0                                            |
| <i>PFelF4AIII</i> | 120                      | 113                     | 0.35±0.21                                                                                                                                                   | 44 (38.9%)              | 90.9%            | 95.2%/94.1%                                    |
| <i>PFBTZ</i>      | 120                      | 115                     | 0.33±0.18                                                                                                                                                   | 115 (100%)              | 50.1%            | 67.5%/92.3%                                    |

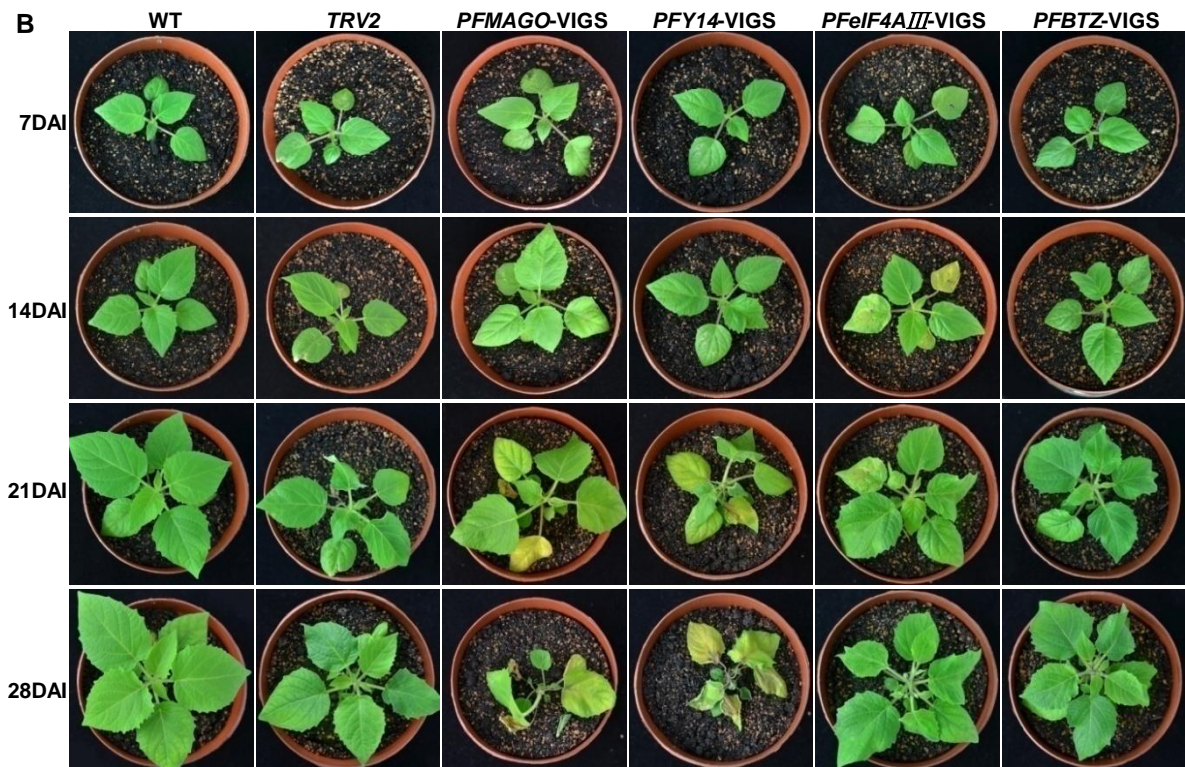

**Fig. S9** Overall analysis of EJC core gene-VIGS in *P. floridana*.

**a** Evaluated parameters are as indicated. **b** Phenotypic variation of VIGS plants at vegetative stages compared to WT and NC. 7DAI, 14DAI, 21DAI and 24DAI indicated 7-, 14-, 21- and 24-d after infection, respectively.

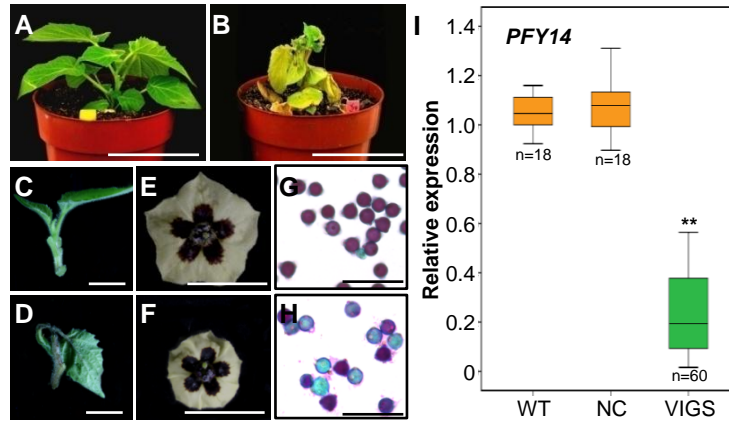

**Fig. S10** *PFY14*-VIGS analysis in *P. floridana*.

**a, b** Plant growth of NC and *PFY14*-VIGS plants at 28DAI stage. **c, d** Shoot apex of NC and *PFY14*-VIGS plants. **e, f** Flower morphology of NC and *PFY14*-VIGS plants. **g, h** Pollen viability of NC and *PFY14*-VIGS plants, which was evaluated by I<sub>2</sub>-KI staining. **i** The *PFY14* expression in flowers of plants as indicated. WT, wild type; NC, negative control; VIGS, *PFY14*-VIGS flowers showing severe pollen abortion. The flower number (n) investigated in each case was indicated. Bars, 10 cm in **a, b**, 1 cm in **c-f**, 100  $\mu$ m in **g, h**. Significance relative to NC was evaluated by a two-tailed Student's *t* test, and \*\* indicates significance at  $P < 0.01$ .

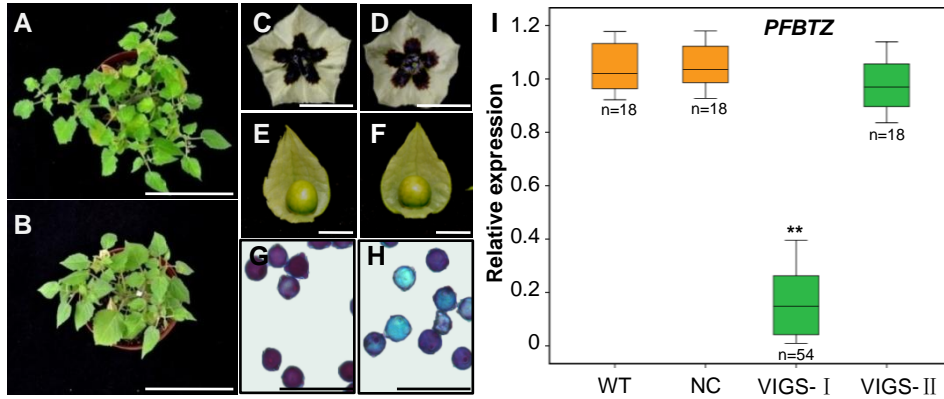

**Fig. S11** *PFBTZ*-VIGS analysis in *P. floridana*.

**a, b** Phenotype of NC and *PFBTZ*-VIGS plants at the fruiting stage. **c, d** Flower morphology of NC and *PFBTZ*-VIGS plants. **e, f** Fruit morphology of NC and *PFBTZ*-VIGS plants. **g, h** Pollen viability of NC and *PFBTZ*-VIGS flowers, which was evaluated by I<sub>2</sub>-KI staining. **i** The *PFBTZ* expression in flowers of plants as indicated. WT, wild type; NC, negative control; VIGS-I, *PFBTZ*-VIGS flowers showing pollen abortion; VIGS-II, *PFBTZ*-VIGS flowers having WT-like pollen development. The flower number (n) investigated in each case was indicated. Bars, 10 cm in **a, b**, 1 cm in **c-f**, 100 μm in **g, h**. Significance relative to NC was evaluated by a two-tailed Student's *t* test, and \*\* indicates significance at  $P < 0.01$ .

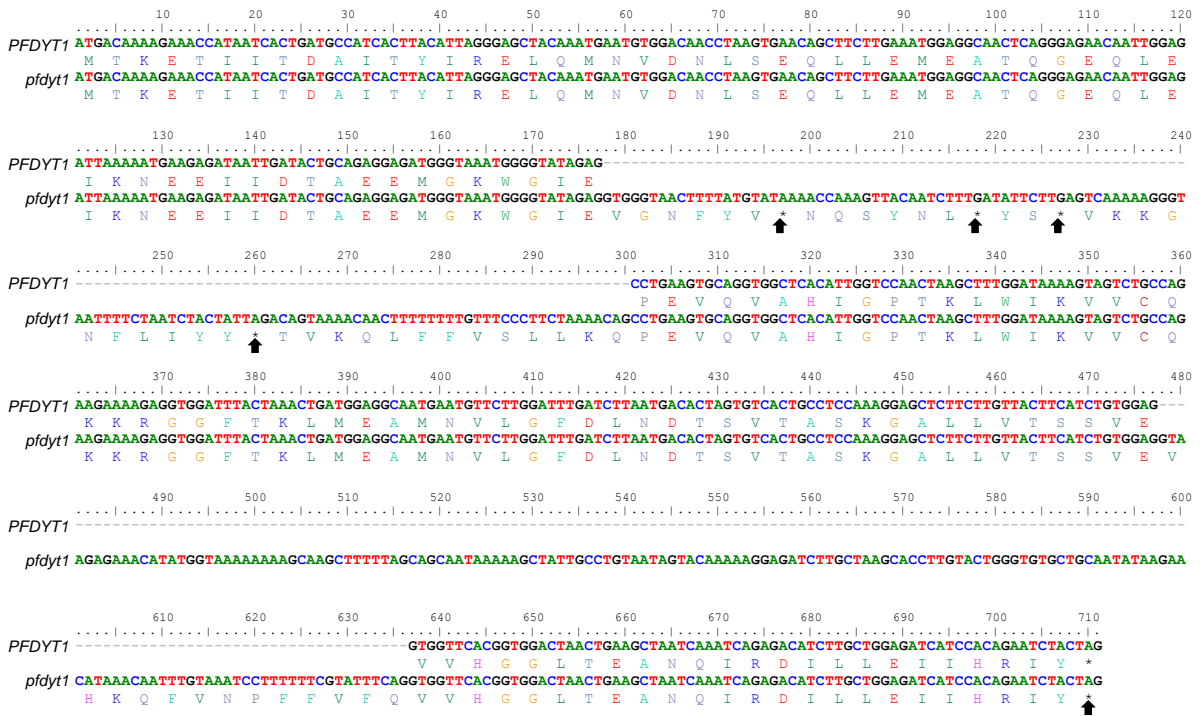

**Fig. S12** Sequence comparison of different *PFDYT1* transcripts.

The normal cDNA of *PFDYT1* was 429 bp long, and putatively encoded a peptide of 142 amino acids (aa). Aberrant transcript (*pfdyt1*) was 711 bp, and maximally encoded a putative 65-aa peptide. Stop codon (\*) was highlighted by black arrows. The - indicates the nucleotide acid gap.

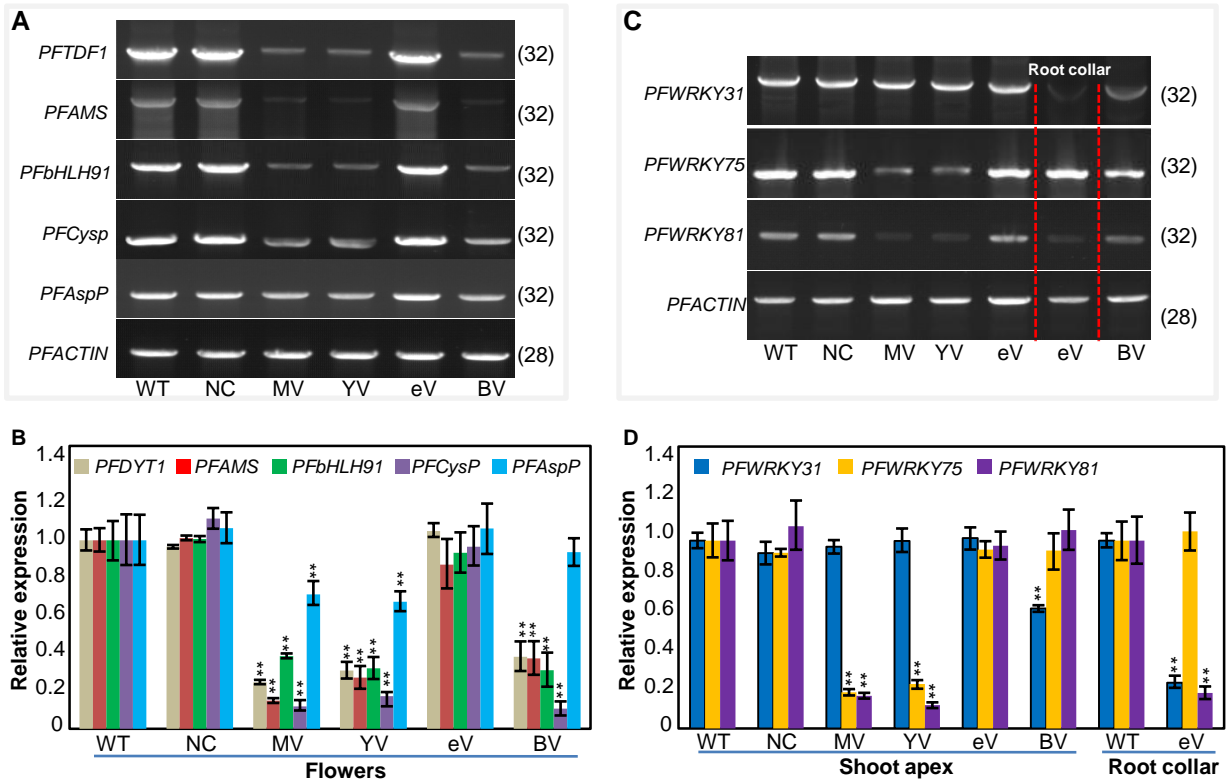

**Fig. S13** Downregulations of EJC core genes affect gene expression.

**a** Full-length transcripts of the indicated genes in flower organs. WT, NC, MV, YV, eV and BV respectively represent wild type, negative control (*TRV2*), and *PFMAGO*-, *PFY14*-, *PfeIF4AIII*- and *PFBTZ-VIGS* *P. floridana* plants. The cycle number is given in the bracket. **b** The gene expression in 7DBF floral buds of the indicated plants. **c** Full-length transcripts of *PFWRKY* family genes in shoot apex or root collar. WT, NC, MV, YV, eV and BV respectively represent wild type, negative control (*TRV2*), and *PFMAGO*-, *PFY14*-, *PfeIF4AIII*- and *PFBTZ-VIGS* *P. floridana* plants. The sample between the two dashed lines is root collar, and others are the shoot apex. The cycle number is given in the bracket. **d** The gene expression of *PFWRKY* family in the shoot apex or root collar of the indicated plants. Significance relative to WT was evaluated by two-tailed Student's *t* test, and \*\* indicates significance at  $P < 0.01$ .

**Table S1** Primers used in the present study.

| Usage                    | Primer name                          | Forward sequence                         | Reverse sequence                          |
|--------------------------|--------------------------------------|------------------------------------------|-------------------------------------------|
| qRT-PCR                  | <i>PFMAGO1</i>                       | AGAATTCGAGTTTCGTCGCCGAC                  | TGACAATCTCAAGCTCTTGCCTC                   |
|                          | <i>PFMAGO2</i>                       | AGTTTACCTGAGATATTACGTG                   | AAGGGGTGAGGAAGACTTCCCTTG                  |
|                          | <i>PFY14</i>                         | AATCAAAGGCCGTGTTCCG                      | AGCCTCCTCATTAACTCCAGTG                    |
|                          | <i>PfeIF4AIII</i>                    | TATTATGGCTGAGTCCGAGGTG                   | CGACCAATGCGATGAATGTAG                     |
|                          | <i>PFBTZ</i>                         | GTGGTGGCATTCTGCTGTTG                     | TTCTGACGCTGGCCTAAGTCG                     |
|                          | <i>PFDYT1 (E1F-E3R)</i>              | ATGACAAAAGAAACCATAATCACTG                | CTAGTAGATCCGTGGATGATCTC                   |
|                          | <i>PFDYT1 (E1F-I1R)</i>              |                                          | GTTGTTTTACTGCTAATAG                       |
|                          | <i>PFDYT1 (I1F-E2R)</i>              | AATCTTTGATATTCTTGAGTC                    | TCCAAGAACATTCTTGCCTC                      |
|                          | <i>PFDYT1 (I2F-E3R)</i>              | GCTAAGCACCTTGTACTGGG                     | CTAGTAGATCCGTGGATGATCTC                   |
|                          | <i>PFDYT1 (E3F-E3R)</i>              | CCTGAAGTGCAGGTGGCTCAC                    |                                           |
|                          | <i>PFTDF1</i>                        | ACTAGCTGGGCAACTAGCTGGG                   | CTTTGTTGACCCATCTTGAGCACC                  |
|                          | <i>PFAMS</i>                         | GGATTGCTCGAGTTGTTCAGTACG                 | TCCGAATTTGATCTCCGTTATC                    |
|                          | <i>PFBHLH</i>                        | TACCAAGTTTAGGTCTCGAGAAG                  | GAGGTATGGAGCTTCAGGCATTGG                  |
|                          | <i>PFA<sub>sp</sub>P</i>             | GCTACCCTAGGAGTTGGACAACC                  | GCAAACTGAGTCACTAGGTCCG                    |
|                          | <i>PFC<sub>ys</sub>P</i>             | GTTGTGGAAGCTGTTGGGCGTTCTC                | GCCACTTATTGAACTGATGCTG                    |
|                          | <i>PFWRKY31</i>                      | GTCAGATGATGGATACAATTGGAG                 | GATATCGATCGCTTGATGTTG                     |
|                          | <i>PFWRKY75</i>                      | TCTTGGGCTAATGGCAAGCATGG                  | GGAAGCATAGATTGTCCTGACTC                   |
| <i>PFWRKY81</i>          | TAATCGTGGTCGGGAGTTTACC               | GTCTTGAATTTGTCACCTGTTTTG                 |                                           |
| <i>PFACTIN</i>           | AACCGAATGGTGAAGCTGG                  | CCATATCATCCCAATTGCTGAC                   |                                           |
| RT-PCR                   | <i>PFDYT1</i>                        | ATGACAAAAGAAACCATAATCACTG                | CTAGTAGATCCGTGGATGATCTC                   |
|                          | <i>PFTDF1</i>                        | ATGGGAGGCCTCCTGTTGC                      | CTAGTAAAGGGATCCTCAGAG                     |
|                          | <i>PFAMS</i>                         | ATGGAGAGGCTTAGCCCTATTATG                 | GTGATGGGATGTCGGTGAAGTG                    |
|                          | <i>PFBHLH</i>                        | AGCATGAAGGAGTAGCTGAAGATG                 | GAGCTCTTGCTATTGCACTTGC                    |
|                          | <i>PFA<sub>sp</sub>P</i>             | GAACCTCAGACCCCTGTCACG                    | ATCAGGACTAAATCCAACAAGG                    |
|                          | <i>PFC<sub>ys</sub>P</i>             | ATGAAGCCATCTTATATTA                      | TCAATAATCCCTTAAGAGG                       |
|                          | <i>PFWRKY31</i>                      | ATGGCTGCTCAAGTTTCTCTTTTC                 | TCAGCAAAGAAATGACTCCATAAAC                 |
|                          | <i>PFWRKY75</i>                      | TATTCGCCAATATGTCCATCG                    | TTAGAAGGAAGCATAGATTG                      |
| <i>PFWRKY81</i>          | ATGGGATCTTATTGCCGGAA                 | GTCTTGAATTTGTCACCTGTTTTG                 |                                           |
| <i>PFACTIN</i>           | ATGGCTGATGGTGAAGATATCC               | GAAGGACCAGACTCATCACTC                    |                                           |
| Y2H                      | <i>PFMAGO1</i>                       | GGCCATGGGGAAATTGGAAGAGAATG               | ATGGATCCGGTTTGATCTTGAATGGAG               |
|                          | <i>PFMAGO2</i>                       | GGCCATGGGGAGATGGCAGAGAAC                 | ATGGATCCGGTTTGATCTTGAATGGAG               |
|                          | <i>PFY14</i>                         | ATCCATGGGGAACGGGAGGAGGCAG                | ATGGATCCTTAGTATCTCCTCTGGGACTTC            |
|                          | <i>PfeIF4AIII</i>                    | TGCCATGGAAGAAGACCCGTTAGTTTTTCG           | AAGGATCCTATCAATTCAGCCACGTTCAATTGG         |
|                          | <i>PFBTZ</i>                         | TGACATATGGCGAGTGCTTGGAAGAAGCAG           | AAGGATCCTCACTGATCAAACCTCATCTCCG           |
| BIFC                     | <i>PFMAGO1</i>                       | CACGGGGACTCTAGAATGGGGAAATGGAAGAGAATG     | CGATGGATCCCACTAGTAAATGGTTGATCTTGAATG      |
|                          | <i>PFMAGO2</i>                       | CACGGGGACTCTAGAATGGGGAGATGGCAGAGAAC      | CGATGGATCCCACTAGTAAATGGTTGATCTTGAATG      |
|                          | <i>PFY14</i>                         | CACGGGGACTCTAGAATGGGAACGGGAGGAGGC        | CGATGGATCCCACTAGTATCTCCTCTGGGACTTC        |
|                          | <i>PfeIF4AIII</i>                    | CACGGGGACTCTAGAATGGAAGAAGACCCGTTAGTTTTTC | CGATGGATCCCACTAGTATCAATTCAGCCACGTTCAATTGG |
| <i>PFBTZ</i>             | CACGGGGACTCTAGAATGGCGAGTGTGGAGAAGCAG | CGATGGATCCCACTAGTCTGATCAAACCTCATCTCCGT   |                                           |
| Subcellular localization | <i>PFMAGO1</i>                       | AACCATGGGGAAATTGGAAGAGAATG               | ATACTAGTAAATGGTTTGATCTTGAATGG             |
|                          | <i>PFMAGO2</i>                       | ATCCATGGGGAGATGGCAGAGAAC                 | ATACTAGTAAATGGTTTGATCTTGAATGG             |
|                          | <i>PFY14-1302</i>                    | AACCATGGGAACGGGAGGAGGCAG                 | CCACTAGTGTATCTGCTCTGGGACTTC               |
|                          | <i>PfeIF4AIII</i>                    | CACCATGGAAGAAGACCCGTTAGTTTTTC            | CCACTAGTATCAATTCAGCCACGTTCAATTGG          |
|                          | <i>PFBTZ-1300</i>                    | AATCTAGATGGCGAGTGCTTGGAAGAAGCAG          | AAGGATCCCTGATCAAACCTCATCTCCGATATC         |
| VIGS                     | <i>PFMAGO</i>                        | ACGGATCCAGTTCGGCACGAGTTCT                | TGCTCGAGATGGTTGATCTTGA                    |
|                          | <i>PFY14</i>                         | ACGGATCCGACGAAGACGTTGAGGG                | TGCTCGAGGCTCATTCCATCCATT                  |
|                          | <i>PfeIF4AIII</i>                    | ACGGATCCAGTTGTTACTGATTT                  | TGCTCGAGCGACCAATGCGATGAA                  |
|                          | <i>PFBTZ</i>                         | ACGGATCCGGAAGCATGGCGAGT                  | TGCTCGAGGGCCTAAGTCGCTATTG                 |

**Table S2** Molecular information of the isolated *Physalis* EJC core genes.

| <b>Gene</b>       | <b>Accession number</b> | <b>ORF length (bp)</b> | <b>Protein length (Amino acid)</b> | <b>Grand average of hydropathicity</b> |
|-------------------|-------------------------|------------------------|------------------------------------|----------------------------------------|
| <i>PFMAGO1</i>    | EF205415                | 456                    | 151                                | -0.523                                 |
| <i>PFMAGO2</i>    | EF205416                | 456                    | 151                                | -0.508                                 |
| <i>PFY14</i>      | KF051015                | 567                    | 188                                | -0.973                                 |
| <i>PFelF4AIII</i> | MH319840                | 1176                   | 391                                | -0.171                                 |
| <i>PFBTZ</i>      | MH319841                | 2067                   | 688                                | -1.024                                 |



**Table S3** Sequences used in the present study.

| Species                           | Abbreviation | Accession number |              |              |              |
|-----------------------------------|--------------|------------------|--------------|--------------|--------------|
|                                   |              | MAGO             | Y14          | eIF4A3       | BTZ          |
| <i>Physalis floridana</i>         | PF           | EF205415         | KF051015     | MH319840     | MH319841     |
|                                   |              | EF205416         |              |              |              |
| <i>Solanum lycopersicum</i>       | Sl           | NM_001291909     | NM_00129108  | XM_004250609 | XP_010318560 |
|                                   |              |                  |              |              | XP_004252328 |
| <i>Solanum pennellii</i>          | Sp           | XP_015067364     | XP_01508009  | XP_015058616 | XP_015070832 |
|                                   |              |                  |              |              | XP_015060990 |
| <i>Nicotiana tomentosiformis</i>  | Nt           | XP_009593407     | XP_009586749 | XP_009616974 | XP_009586607 |
|                                   |              |                  |              |              | XP_009595299 |
| <i>Capsicum annuum</i>            | Ca           | XP_016558805.1   | XP_016574886 | XP_016554349 | PHT88780     |
| <i>Populus trichocarpa</i>        | Pt           | XM_006375098     | XM_002299753 | XM_002306354 | XM_006369105 |
|                                   |              |                  | XM_002314049 | XM_002310627 | XM_002303242 |
| <i>Arabidopsis thaliana</i>       | At           | NM_100094        | NM_104029    | NM_112866    | NM_202458    |
|                                   |              |                  |              |              | NM_101397    |
| <i>Vitis vinifera</i>             | Vv           | XP_002281294     | XP_002281228 | XP_002275011 | XP_010654695 |
| <i>Oryza sativa</i>               | Os           | KF051011         | KF051016     | NM_001050208 | XP_015650091 |
|                                   |              | KF051008         | KF051017     | NM_001057041 | XP_015640548 |
| <i>sorghum bicolor</i>            | Sb           | 02g027660        | XP_002439249 | 04g038330    | XP_002455883 |
|                                   |              | 07g027660        | XP_002457845 |              | XP_021303601 |
| <i>Brachypodium distachyon</i>    | Bd           | XP_003573269     | XP_003568971 | XP_003570724 | XP_003569296 |
|                                   |              |                  | XP_003567720 |              | XP_003565997 |
| <i>Volvox carteri nagariensis</i> | Vc           | XM_001770356     | XP_002953417 | XP_002958883 | XP_002951521 |
| <i>Chlamydomonas reinhardtii</i>  | Cr           | XM_001763749     | XP_001696992 | XP_001699375 | XP_001698374 |
| <i>Homo sapiens</i>               | Hs           | NM_002370        | NM_005105    | NM_014740    | XM_005257163 |
|                                   |              | NM_018048        |              |              |              |
| <i>Mus musculus</i>               | Mm           | NM_001282737     | NM_001102407 | NM_138669    | NM_138660    |
|                                   |              | NM_025564        |              |              |              |
| <i>Danio rerio</i>                | Dr           | NP_001017700     | NP_001013363 | NP_957372    | NM_205716    |
| <i>Xenopus tropicalis</i>         | Xt           | XP_002931471     | NP_001039147 | NP_001084200 | NM_001012652 |
|                                   |              |                  |              | NP_001107349 |              |
